# Supplementary material for: Palatine Tonsil Stenting of the Airway as Determined by Drug-Induced Sleep Endoscopy
Source: Case Rep Otolaryngol. 2018 Dec 10;2018:2614143. doi: 10.1155/2018/2614143 (PMC6311753; doi:10.1155/2018/2614143)
Supplement: Supplementary Materials — Video 1: this video begins with tonsillar-splinting phenomenon in the case report of the patient. Preoperatively, the tonsils are stenting the oropharyngeal airway and remain in a static nonobstructing position throughout respiration. The epiglottis represents main source of obstruction. The latter half of the video shows postoperative airway after tonsillectomy and epiglottopexy. There is now collapse of the tongue base only months after initial surgery when the previous tonsillar positioning would prevent such obstruction by splinting the airway open. Video 2: Patient #1 shows static, splinting tonsils throughout respiration with obstruction secondary to retroflexed epiglottis. Patient #2 shows splinting tonsils preventing further collapse of the posterior base of the tongue against the epiglottis. Patient #3 shows enlarged tonsils preventing obstruction of the tongue against the retroflexed epiglottis. Subsequent endoscopy after lingual tonsillectomy and epiglottopexy shows continued tonsillar splinting, but obstruction now due to arytenoid collapse. [file 2614143.f1.zip]

Archive with 2 entries (2 files):
- 2614143.f1/Video_1_CRIOT_2594664.mp4
- 2614143.f1/Video_2_CRIOT_2594665.mp4
